# Supplementary material for: Machine learning models for predicting medium-term heart failure prognosis: Discrimination and calibration analyses
Source: Research Square preprint supplement (doi:10.21203/rs.3.rs-6008877/v1), 2025-02-24
Supplement: Supplementary file 1 [file e5ca5169464df7327a70af0f.docx]

**Supplemental Tables**

**Supplemental Table 1. Medications for guideline-directed medical therapy**

| Beta-blockers |
| --- |
| Angiotensin-converting enzyme inhibitors |
| Angiotensin II receptor blockers |
| Angiotensin receptor neprilysin inhibitors |
| Mineralocorticoid receptor antagonists |
| Aspirin |
| P2Y12 inhibitors |
| Direct oral anticoagulants |
| Warfarin |
| Loop diuretics |
| Mineral corticoid receptor antagonists |
| Tolvaptan |
| Sodium-glucose cotransporter 2 inhibitors |
| Statins |
| Proton pump inhibitors |

**Supplemental Table 2. Scoring for nursing care needs**

|  | **0 points** | **1 point** | **2 points** |
| --- | --- | --- | --- |
| Turning over in bed | Can do | Can do with support | Cannot do |
| Transfers | No assistance | Partial assistance | Full assistance |
| Oral hygiene | No assistance | Needs assistance | – |
| Feeding | No assistance | Partial assistance | Full assistance |
| Dressing/undressing | No assistance | Partial assistance | Full assistance |
| Following instructions for treatment and nursing care | Yes | No | – |
| Risky behavior | None | – | Present |

**Supplemental Table 3. Hyperparameter search space for machine learning models**

| Model | Parameters | Search area |
| --- | --- | --- |
| Logistic regression | C | 1e-6, 1e-4, 1e-2, 1, 1e2, 1e4, 1e6 |
|  | max_iter | 10000 |
|  | class_weight | balanced |
|  | solver | liblinear |
| Random forests | n_estimators | 50, 100, 200, 500 |
|  | max_depth | 10, 20, 30 |
|  | min_samples_split | 2, 5, 10 |
|  | min_samples_leaf | 1, 2, 4 |
| Extreme gradient boosting | n_estimators | 50, 100, 200, 500 |
|  | max_depth | 3, 5, 7, 10 |
|  | colsample_bytree | 0.3, 0.5, 0.7,1.0 |
|  | subsample | 0.5, 0.7, 0.9, 1.0 |
|  | gamma | 0, 0.1, 0.2 |
|  | min_child_weight | 1, 3, 5 |
| Light gradient boosting machine | n_estimators | 50, 100, 200, 500 |
|  | max_depth | 3, 5, 7, 10 |
|  | num_leaves | 31, 64, 128 |
|  | colsample_bytree | 0.3, 0.5, 0.7,1.0 |
|  | subsample | 0.5, 0.7, 0.9, 1.0 |
|  | min_child_samples | 5, 10, 20 |

| Model | Best Parameters |
| --- | --- |
| Logistic regression | {'C': 1} |
| Random forests | {'n_estimators': 200, 'max_depth': 10, 'min_samples_split': 4, 'min_samples_leaf': 4} |
| Extreme gradient boosting | {'colsample_bytree': 0.7, 'gamma': 0, 'max_depth': 3, 'min_child_weight': 5, 'n_estimators': 50, 'subsample': 1.0} |
| Light gradient boosting machine | {'colsample_bytree': 0.3, 'max_depth': 3, 'min_child_samples': 10, 'n_estimators': 50, 'num_leaves': 31, 'subsample': 0.5} |

**Supplemental Table 4. Optimal hyperparameters for each machine learning model**

**Supplemental Table 5. Selected features**

| **Feature** | **Logistic regression** | **Random forests** | **Extreme gradient boosting** | **Light gradient boosting machine** |
| --- | --- | --- | --- | --- |
| Number of selected features | 28 | 51 | 52 | 36 |
| Demographics |  |  |  |  |
| Age (years) | ● | ● | ● | ● |
| Male sex | ● | ● | ● | ● |
| Body mass index (kg/m2) |  | ● | ● | ● |
| Hospitalization days (day) |  | ● | ● | ● |
| Nursing care needs score at discharge | ● | ● | ● | ● |
| Prior emergency hospitalizations | ● | ● | ● | ● |
| Comorbidities |  |  |  |  |
| Acute coronary syndrome: ICD10; I200, I21 |  | ● |  |  |
| Atrial fibrillation: ICD10; I48 |  | ● |  |  |
| Dyslipidemia: ICD10; E78 | ● | ● | ● |  |
| Diabetes mellitus: ICD10; E10–E14 |  | ● | ● |  |
| Hypertension: ICD10; I10–I12, I15 | ● | ● | ● | ● |
| Ischemic heart disease: ICD10; I201–209, I22–25 |  | ● |  |  |
| Medications at discharge |  |  |  |  |
| Beta-blockers | ● | ● | ● | ● |
| ACE-Is / ARBs and ARNIs | ● | ● | ● | ● |
| Aspirin |  | ● | ● |  |
| P2Y12 inhibitors |  |  | ● |  |
| Direct oral anticoagulants |  | ● | ● |  |
| Warfarin | ● | ● | ● |  |
| Loop diuretics | ● | ● | ● |  |
| Mineral corticoid receptor antagonists |  | ● | ● |  |
| Tolvaptan | ● | ● | ● | ● |
| SGLT2 inhibitors |  |  | ● |  |
| Statins | ● | ● | ● |  |
| Proton pump inhibitors |  | ● | ● |  |
| Pimobendan | ● |  |  |  |
| Gout medications |  | ● |  |  |
| Psychiatric drugs | ● |  | ● |  |
| Hypnotics |  | ● | ● |  |
| Number of ni-GDMT medications | ● | ● | ● | ● |
| In-hospital treatments |  |  |  |  |
| Catecholamines |  | ● | ● |  |
| Opioids |  |  | ● |  |
| Intravenous loop diuretics dosage (mg) / hospitalization |  | ● | ● | ● |
| Ventilator |  |  | ● |  |
| Mechanical circulatory supports | ● |  |  |  |
| Hemodialysis | ● |  |  |  |
| Laboratory findings at admission |  |  |  |  |
| White blood cells (103/µL) |  | ● | ● | ● |
| Hemoglobin (g/dL) |  | ● | ● | ● |
| Aspartate transaminase (IU/L) | ● | ● | ● | ● |
| Alanine transaminase (IU/L) | ● | ● | ● | ● |
| Albumin (g/dL) |  | ● | ● | ● |
| Blood urea nitrogen (mg/dL) |  | ● | ● | ● |
| Creatine kinase (IU/L) | ● | ● | ● | ● |
| Uric acid (mg/dL) |  | ● | ● | ● |
| eGFR (mL/min/1.73 m2) | ● | ● | ● | ● |
| Sodium (mEq/L) |  | ● | ● | ● |
| Potassium (mEq/L) |  | ● | ● | ● |
| NT-proBNP (pg/mL) |  | ● | ● | ● |
| Laboratory findings at discharge |  |  |  |  |
| White blood cells (103/µL) |  | ● | ● | ● |
| Hemoglobin (g/dL) | ● | ● | ● | ● |
| Aspartate transaminase (IU/L) |  | ● | ● | ● |
| Alanine transaminase (IU/L) |  | ● | ● | ● |
| Albumin (g/dL) | ● | ● | ● | ● |
| Blood urea nitrogen (mg/dL) |  | ● | ● | ● |
| Creatine Kinase (IU/L) |  | ● | ● | ● |
| Uric acid (mg/dL) | ● | ● | ● | ● |
| eGFR (mL/min/1.73 m2) | ● | ● | ● | ● |
| Sodium (mEq/L) | ● | ● | ● | ● |
| Potassium (mEq/L) | ● | ● | ● | ● |
| NT-proBNP (pg/mL) | ● | ● | ● | ● |

ICD, international statistical classification of diseases and related health problems; ACE-Is, angiotensin-converting enzyme inhibitors; ARBs, angiotensin II receptor blockers; ARNIs, angiotensin receptor neprilysin inhibitors; SGLT2, sodium-glucose cotransporter 2; ni-GDMT, not included in the guideline-directed medical therapy; eGFR, estimated glomerular filtration rate; NT-proBNP, N-terminal pro-brain natriuretic peptide

**Supplemental Figure 1.**


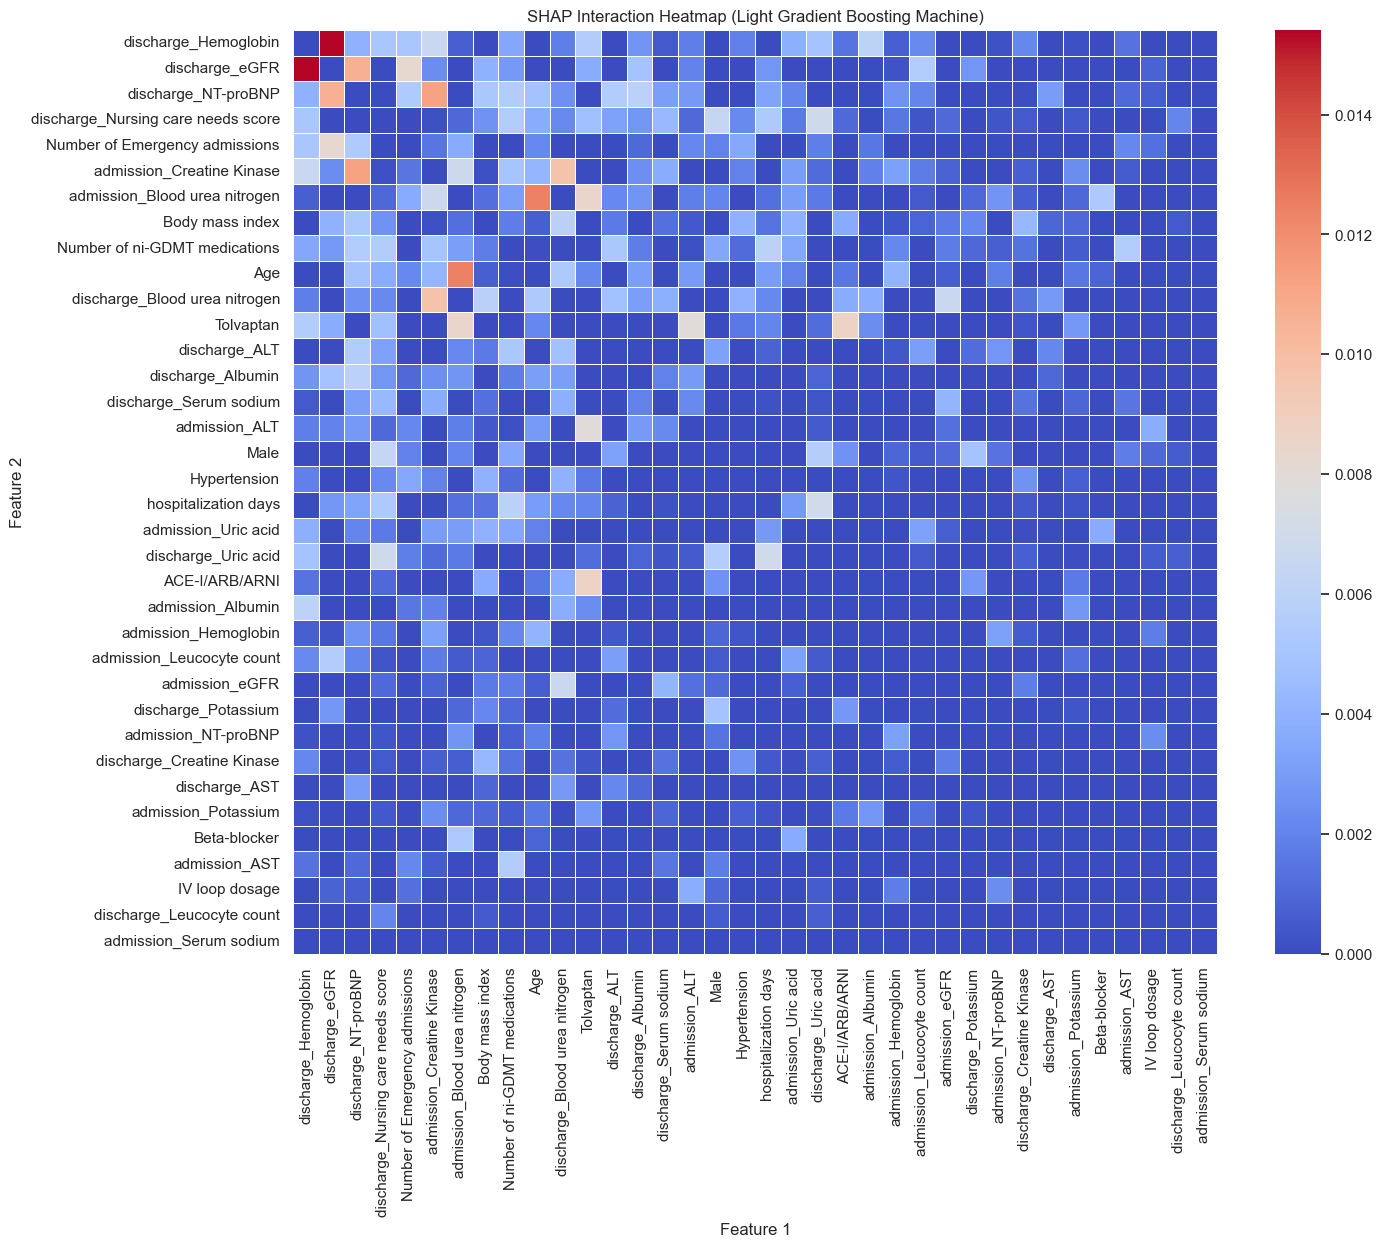


**Supplementary Fig 1. SHapley Additive exPlanations (SHAP) interaction heat map**

A full matrix heatmap showing the interactions between features in the Light Gradient Boosting Machine is presented. ACE-I, angiotensin-converting enzyme inhibitor; ARB, angiotensin II receptor blocker; ARNI, angiotensin receptor neprilysin inhibitor; ni-GDMT, not included in the guideline-directed medical therapy; ALT, alanine transaminase; AST, aspartate transaminase; NT-proBNP, N-terminal pro-brain natriuretic peptide; eGFR, estimated glomerular filtration rate
